# Supplementary material
Source: PubMed Central journal article supplement (PMC2764890)
Supplement: 0906390106_0906390106SI.pdf [file 0906390106_0906390106SI.pdf]

# Supporting Information

Oberai et al. 10.1073/pnas.0906390106

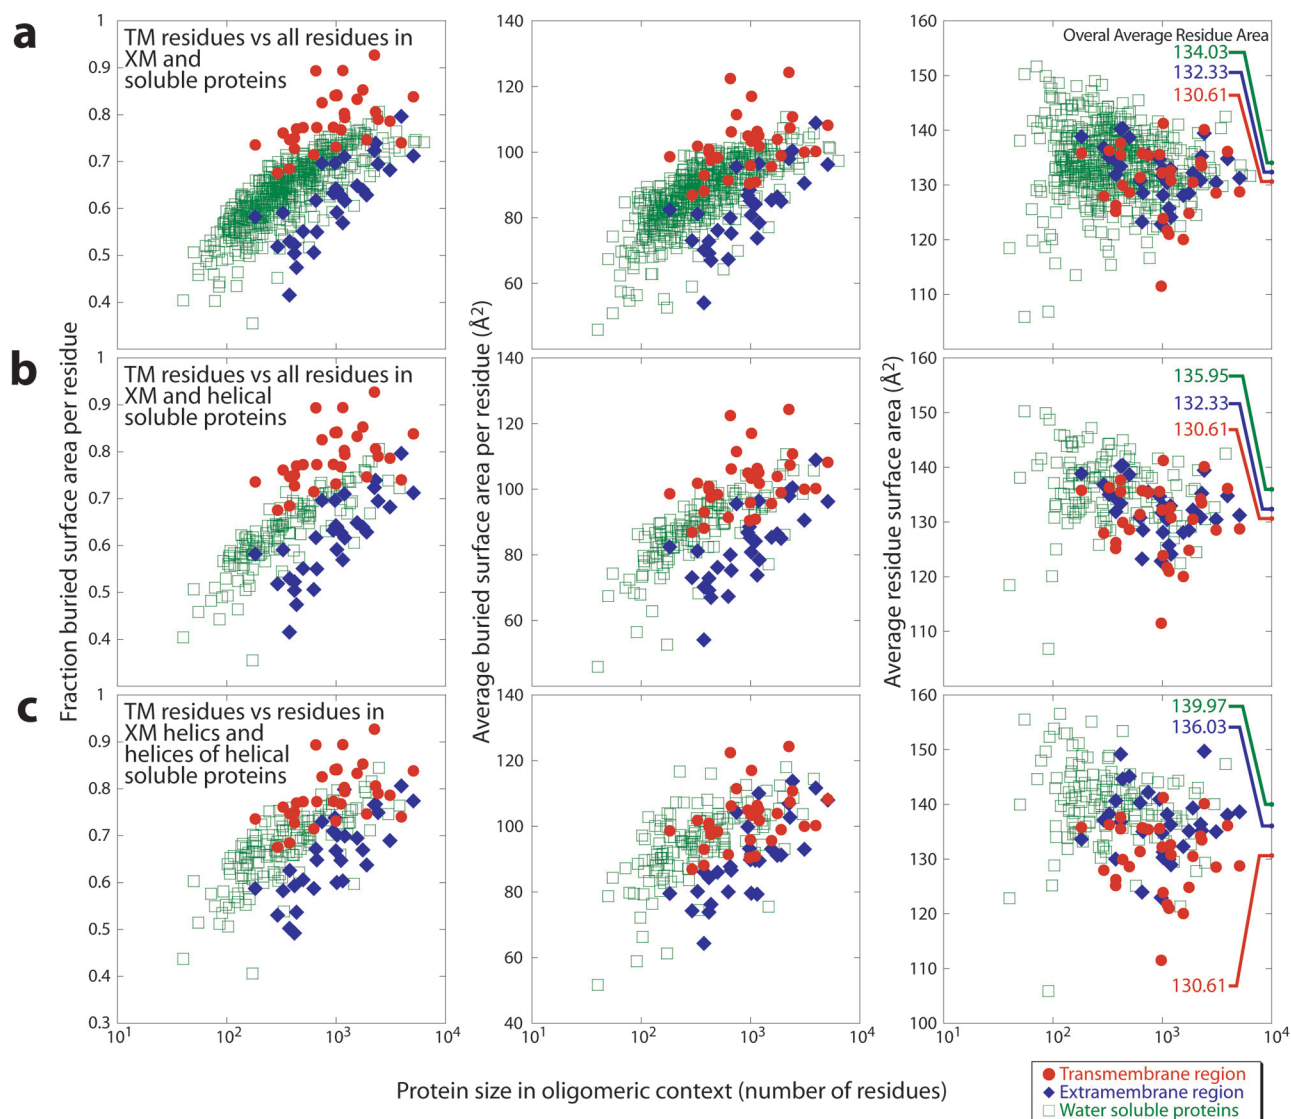

**Fig. S1.** More extensive burial of smaller residues in the transmembrane (TM) region compared with the extramembrane (XM) region of membrane proteins and soluble proteins. (A) Comparison of burial and size trend for residues in the TM and XM regions of membrane proteins and water-soluble proteins. (B) Comparison of burial and size trend for residues in the TM regions and XM regions of membrane proteins and helical water-soluble proteins. (C) Comparison of burial and size trend for residues in the TM region of helical membrane proteins, helices in the XM region of membrane proteins, and helices of helical water-soluble proteins. In each comparison, the fraction buried surface area (*Left*), average buried surface area (*Center*), and the average residue surface area for each protein (*Right*) are shown as a function of the size of the protein quaternary structure. The overall average sizes, in terms of surface area ( $\text{\AA}^2$ ), for residues in the different regions of membrane and soluble proteins are listed on the y-axis of each panel on the right, color coded according to the region of the protein, red for the transmembrane region, blue for the extramembrane region, and green for water soluble proteins.

**Table S1. Conservation scores for the transmembrane (TM) and extramembrane (XM) regions of 21 chains from 19 helical membrane proteins. Shown are scores for the overall protein and for different levels of burial, divided into quartiles: 1 (0–52% buried), 2 (52.1–81.3% buried), 3 (81.4–97.3% buried), and 4 (97.4–100% buried)**

| PDB      | TM-1     | XM-1     | TM-2     | XM-2     | TM-3     | XM-3     | TM-4     | XM-4     | TM-all   | XM-all   |
|----------|----------|----------|----------|----------|----------|----------|----------|----------|----------|----------|
| 1dxrL,M  | 0.296305 | 0.222822 | 0.34599  | 0.313049 | 0.399967 | 0.396724 | 0.525527 | 0.459542 | 0.425028 | 0.3645   |
| 1ehkA    | 0.199539 | 0.248401 | 0.326694 | 0.312138 | 0.383285 | 0.501342 | 0.510493 | 0.53082  | 0.418585 | 0.401242 |
| 1gzmA    | 0.464341 | 0.536739 | 0.64071  | 0.549307 | 0.69675  | 0.608558 | 0.792465 | 0.72313  | 0.663549 | 0.584056 |
| 1l7vA    | 0.098776 | 0.121704 | 0.282213 | 0.279717 | 0.423054 | 0.361636 | 0.461246 | 0.597844 | 0.337573 | 0.265995 |
| 1ldfA    | 0.234858 | 0.167305 | 0.32347  | 0.181379 | 0.430394 | 0.437722 | 0.495069 | 0.35701  | 0.414289 | 0.254564 |
| 1m0lA    | 0.344908 | 0.235004 | 0.299357 | 0.258367 | 0.424457 | 0.372982 | 0.608916 | 0.361141 | 0.43086  | 0.281379 |
| 1okcA    | 0.244696 | 0.180098 | 0.439857 | 0.322401 | 0.496763 | 0.412846 | 0.495532 | 0.470482 | 0.416844 | 0.282618 |
| 1otsA    | 0.173443 | 0.157438 | 0.207157 | 0.213695 | 0.330494 | 0.264434 | 0.508889 | 0.455589 | 0.375449 | 0.247942 |
| 1pw4A    | 0.301328 | 0.280996 | 0.3406   | 0.451844 | 0.438463 | 0.448966 | 0.464577 | 0.444444 | 0.395841 | 0.354883 |
| 1q16C    | 0.317565 | 0.351298 | 0.404779 | 0.414255 | 0.492464 | 0.608554 | 0.68116  | 0.721429 | 0.472163 | 0.512668 |
| 1q90B,D  | 0.410703 | 0.405503 | 0.441088 | 0.511445 | 0.579315 | 0.642908 | 0.620099 | 0.702981 | 0.546047 | 0.560058 |
| 1rwtB    | 0.283394 | 0.435005 | 0.439983 | 0.479176 | 0.615746 | 0.53954  | 0.59478  | 0.578442 | 0.567921 | 0.488342 |
| 1u7 gA   | 0.054883 | 0.155036 | 0.262759 | 0.197441 | 0.299348 | 0.366371 | 0.43874  | 0.444563 | 0.351924 | 0.242558 |
| 1wpgA    | 0.141784 | 0.158355 | 0.202454 | 0.27818  | 0.335087 | 0.408048 | 0.290434 | 0.565309 | 0.246082 | 0.321421 |
| 1zcdA    | 0.265961 | 0.240172 | 0.411253 | 0.351812 | 0.577676 | 0.431479 | 0.644919 | 0.691898 | 0.485044 | 0.339335 |
| 2a65A    | 0.194267 | 0.191029 | 0.191773 | 0.221084 | 0.301876 | 0.336162 | 0.394519 | 0.493177 | 0.309973 | 0.286671 |
| 2cfqA    | 0.503081 | 0.418334 | 0.605101 | 0.479837 | 0.624325 | 0.641374 | 0.673874 | 0.782161 | 0.604639 | 0.489257 |
| 2 gifA   | 0.284758 | 0.259915 | 0.39479  | 0.368243 | 0.592823 | 0.445265 | 0.635944 | 0.524079 | 0.503077 | 0.386634 |
| 2nwlA    | 0.202072 | 0.24317  | 0.296256 | 0.288103 | 0.436737 | 0.454238 | 0.466691 | 0.471693 | 0.374573 | 0.336733 |
| OVER-ALL | 0.264035 | 0.263596 | 0.360857 | 0.340604 | 0.467317 | 0.456797 | 0.542309 | 0.546091 | 0.438919 | 0.368466 |

**Table S2. Disease-associated nonsynonymous SNPs that were mapped onto membrane protein structures, based on regions that could be well aligned**

| Protein structure (PDB ID)                        | Disease variant location | Residues associated with disease variants | Fraction residue area buried              | Disease gene (OMIM ID, % ID if applicable), disease mutation, disease* |
|---------------------------------------------------|--------------------------|-------------------------------------------|-------------------------------------------|------------------------------------------------------------------------|
| Rhodopsin (1GZM)                                  | Trans-membrane domain    | F45                                       | 0.42                                      | Rhodopsin (180380, 100%) F45L, retinitis                               |
|                                                   |                          | G51                                       | 1                                         | Rhodopsin (180380, 100%) G51R, retinitis                               |
|                                                   |                          | P53                                       | 0.53                                      | Rhodopsin (180380, 100%) P53R, retinitis                               |
|                                                   |                          | T58                                       | 1                                         | Rhodopsin (180380, 100%) T58R, retinitis                               |
|                                                   |                          | V87                                       | 1                                         | Rhodopsin (180380, 100%) V87D, retinitis                               |
|                                                   |                          | G89                                       | 0.63                                      | Rhodopsin (180380, 100%) G89D, retinitis                               |
|                                                   |                          | G90                                       | 0.98                                      | Rhodopsin (180380, 100%) G90D, retinitis                               |
|                                                   |                          | T94                                       | 1                                         | Rhodopsin (180380, 100%) T94I, night blindness                         |
|                                                   |                          | C110                                      | 0.98                                      | Rhodopsin (180380, 100%) C110Y, retinitis                              |
|                                                   |                          | G114                                      | 1                                         | Rhodopsin (180380, 100%) G114D, retinitis                              |
|                                                   |                          | A164                                      | 1                                         | Rhodopsin (180380, 100%) A164E, retinitis                              |
|                                                   |                          | P171                                      | 0.95                                      | Rhodopsin (180380, 100%) P171S, retinitis                              |
|                                                   |                          | M207                                      | 1                                         | Rhodopsin (180380, 100%) M207R, retinitis                              |
|                                                   |                          | H211                                      | 1                                         | Rhodopsin (180380, 100%) H211P, retinitis                              |
|                                                   |                          | P267                                      | 0.56                                      | Rhodopsin (180380, 100%) P267L, retinitis                              |
|                                                   | A292                     | 0.99                                      | Rhodopsin (180380, 100%) A292E, retinitis |                                                                        |
|                                                   | Soluble domain           | K296                                      | 0.98                                      | Rhodopsin (180380, 100%) K296E, retinitis                              |
|                                                   |                          | N15                                       | 0.43                                      | Rhodopsin (180380, 100%) N15S, retinitis                               |
|                                                   |                          | T17                                       | 0.12                                      | Rhodopsin (180380, 100%) T17M, retinitis                               |
|                                                   |                          | P23                                       | 1                                         | Rhodopsin (180380, 100%) P23H, retinitis                               |
|                                                   |                          |                                           |                                           | Rhodopsin (180380, 100%) P23A, retinitis                               |
|                                                   |                          | G106                                      | 0.71                                      | Rhodopsin (180380, 100%) G106W, retinitis                              |
|                                                   |                          |                                           |                                           | Rhodopsin (180380, 100%) G106R, retinitis                              |
| R135                                              |                          | 0.94                                      | Rhodopsin (180380, 100%) R135L, retinitis |                                                                        |
|                                                   |                          | Rhodopsin (180380, 100%) R135W, retinitis |                                           |                                                                        |
| E150                                              | 0.43                     | Rhodopsin (180380, 100%) E150K, retinitis |                                           |                                                                        |
| Y178                                              | 0.94                     | Rhodopsin (180380, 100%) Y178C, retinitis |                                           |                                                                        |
| G182                                              | 0.93                     | Rhodopsin (180380, 100%) G182S, retinitis |                                           |                                                                        |
| D190                                              | 1                        | Rhodopsin (180380, 100%) D190G, retinitis |                                           |                                                                        |
|                                                   |                          | Rhodopsin (180380, 100%) D190N, retinitis |                                           |                                                                        |
|                                                   |                          | Rhodopsin (180380, 100%) D190Y, retinitis |                                           |                                                                        |
| Ca <sup>2+</sup> ATPase#                          | Trans-membrane domain    | C268                                      | 0.55 ± 0.4                                | AT2A2 (108740, 84%) C268F, Darrier disease                             |
|                                                   |                          | A305                                      | 1 ± 0.004                                 | AT2C1 (604384, 32%) A304T, Hailey-Hailey disease                       |
|                                                   |                          | N768                                      | 0.95 ± 0.009                              | AT2A2 (108740, 84%) N767S, Darrier disease                             |
|                                                   |                          | G770                                      | 1 ± 0.02                                  | AT2A2 (108740, 84%) G769R, Darrier disease                             |
|                                                   |                          | P789                                      | 0.93 ± 0.04                               | AT2A1 (108730, 100%) P789L, Brody myopathy                             |
|                                                   |                          | G23                                       | 0.91 ± 0.01                               | AT2A2 (108740, 84%) G23E, Darrier disease                              |
|                                                   | Soluble domain           | R131                                      | 0.88 ± 0.01                               | AT2A2 (108740, 84%) R131Q, Darrier disease                             |
|                                                   |                          | V459                                      | 0.86 ± 0.07                               | AT2B2 (108733, 31%) V587M, deafness                                    |
|                                                   |                          | C525                                      | 0.9 ± 0.027                               | AT2C1 (604384, 32%) C490F, Hailey-Hailey disease                       |
|                                                   |                          | C561                                      | 0.73 ± 0.05                               | AT2A2 (108740, 84%) C560R, Darrier disease                             |
|                                                   |                          | P603                                      | 0.78 ± 0.03                               | AT2A2 (108740, 84%) P602L, acrokeratosis                               |
|                                                   |                          | V170                                      | 0.75                                      | Kv1.1 (176260, 80%) V174F, episodic ataxia                             |
|                                                   |                          | I173                                      | 0.99                                      | Kv1.1 (176260, 80%) I177R, episodic ataxia                             |
| Voltage-gated K <sup>+</sup> channel Kv1.2 (2R9R) | Trans-membrane domain    | F180                                      | 1                                         | Kv1.1 (176260, 80%) F184C, episodic ataxia                             |
|                                                   |                          | T227                                      | 0.84                                      | Kv1.1 (176260, 80%) T226R, myokymia1                                   |
|                                                   |                          |                                           |                                           | Kv1.1 (176260, 80%) T226C, myokymia1                                   |
|                                                   |                          |                                           |                                           | Kv1.1 (176260, 80%) T226A, myokymia1                                   |
|                                                   |                          |                                           |                                           | Kv1.1 (176260, 80%) R239S, episodic ataxia                             |
|                                                   | Soluble domain           | R296                                      | 0.95                                      | Kv3.3 (176264, 45%) R420H, spinocerebral ataxia                        |
|                                                   |                          | E323                                      | 0.9                                       | Kv1.1 (176260, 80%) E325D, episodic ataxia                             |
|                                                   |                          | V402                                      | 0.89                                      | Kv1.1 (176260, 80%) V404I, episodic ataxia                             |
|                                                   |                          | A243                                      | 0.94                                      | Kv1.1(176260, 80%) A242P, myokymia1                                    |
|                                                   |                          | P245                                      | 0.56                                      | Kv1.1(176260, 80%) P244H, myokymia1                                    |
| Voltage-gated K <sup>+</sup> channel Kv1.2 (2R9R) | Trans-membrane domain    | F250                                      | 0.98                                      | Kv1.1(176260, 80%) F249I, episodic ataxia                              |
|                                                   |                          | V406                                      | 0.85                                      | Kv1.1(176260, 80%) V408A, episodic ataxia                              |
|                                                   |                          | A162                                      | 0.984                                     | KCNQ1, C122Y, long QT                                                  |
|                                                   |                          | I173                                      | 0.987                                     | KCNQ1, V133I, long QT                                                  |
|                                                   |                          | S176                                      | 0.988                                     | KCNQ1, C136F, long QT                                                  |
| I177                                              | 0.971                    | KCNQ1, L137F, long QT                     |                                           |                                                                        |

| Protein structure (PDB ID)                        | Disease variant location | Residues associated with disease variants | Fraction residue area buried | Disease gene (OMIM ID, % ID if applicable), disease mutation, disease* |
|---------------------------------------------------|--------------------------|-------------------------------------------|------------------------------|------------------------------------------------------------------------|
| Voltage-gated K <sup>+</sup> channel Kv1.2 (2R9R) | Trans-membrane domain    | F180                                      | 1                            | KCNQ1, S140G, atrial fibrillation                                      |
|                                                   |                          | T184                                      | 1                            | KCNQ1, T144A, long QT                                                  |
|                                                   |                          | F223                                      | 0.926                        | KCNQ1, F157C, long QT                                                  |
|                                                   |                          | E226                                      | 0.967                        | KCNQ1, E160K, long QT                                                  |
|                                                   |                          | S234                                      | 0.819                        | KCNQ1, G168R, long QT                                                  |
|                                                   |                          | L238                                      | 0.465                        | KCNQ1, V172M, long QT                                                  |
|                                                   |                          | R240                                      | 0.955                        | KCNQ1, R174C, long QT                                                  |
|                                                   |                          |                                           |                              | KCNQ1, R174H, long QT                                                  |
|                                                   |                          |                                           |                              | KCNQ1, R174P, long QT                                                  |
|                                                   |                          | D259                                      | 0.954                        | KCNQ1, D202N, long QT                                                  |
|                                                   |                          |                                           |                              | KCNQ1, D202H, long QT                                                  |
|                                                   |                          | V261                                      | 0.726                        | KCNQ1, I204M, long QT                                                  |
|                                                   |                          |                                           |                              | KCNQ1, I204F, long QT                                                  |
|                                                   |                          | F301                                      | 0.655                        | KCNQ1, L239P, long QT                                                  |
|                                                   |                          | S304                                      | 0.852                        | KCNQ1, D242N, long QT                                                  |
|                                                   |                          |                                           |                              | KCNQ1, D242E, long QT                                                  |
|                                                   |                          | R305                                      | 0.764                        | KCNQ1, R243C, long QT                                                  |
|                                                   |                          |                                           |                              | KCNQ1, R243P, long QT                                                  |
|                                                   |                          |                                           |                              | KCNQ1, R243H, long QT                                                  |
|                                                   |                          | S320                                      | 1                            | KCNQ1, H258N, long QT                                                  |
|                                                   |                          |                                           |                              | KCNQ1, H258R, long QT                                                  |
|                                                   |                          | M321                                      | 0.207                        | KCNQ1, R259H, long QT                                                  |
|                                                   |                          |                                           |                              | KCNQ1, R259C, long QT                                                  |
|                                                   |                          |                                           |                              | KCNQ1, R259L, long QT                                                  |
|                                                   |                          | E323                                      | 0.899                        | KCNQ1, E261D, long QT                                                  |
|                                                   |                          |                                           |                              | KCNQ1, E261K, long QT                                                  |
|                                                   |                          | L324                                      | 0.765                        | KCNQ1, L262V, long QT                                                  |
|                                                   |                          | I328                                      | 0.451                        | KCNQ1, L266P, long QT                                                  |
|                                                   |                          | L331                                      | 0.951                        | KCNQ1, G269S, long QT                                                  |
|                                                   |                          |                                           |                              | KCNQ1, G269D, long QT                                                  |
|                                                   |                          | G334                                      | 0.802                        | KCNQ1, G272D, long QT                                                  |
|                                                   |                          | V335                                      | 0.888                        | KCNQ1, L273F, long QT                                                  |
|                                                   |                          |                                           |                              | KCNQ1, L273R, long QT                                                  |
|                                                   |                          | I336                                      | 0.962                        | KCNQ1, I274V, sudden infant death syndrome                             |
|                                                   |                          | L337                                      | 0.73                         | KCNQ1, F275S, long QT                                                  |
|                                                   |                          | S339                                      | 1                            | KCNQ1, S277L, long QT                                                  |
|                                                   |                          |                                           |                              | KCNQ1, S277W, long QT                                                  |
|                                                   |                          | S340                                      | 0.994                        | KCNQ1, Y278H, long QT                                                  |
|                                                   |                          | V342                                      | 1                            | KCNQ1, V280A, long QT                                                  |
|                                                   |                          |                                           |                              | KCNQ1, V280E, long QT                                                  |
|                                                   |                          | Y343                                      | 0.916                        | KCNQ1, Y281C, long QT                                                  |
|                                                   |                          | P358                                      | 0.709                        | KCNQ1, A300T, long QT                                                  |
|                                                   |                          | A360                                      | 1                            | KCNQ1, A302V, long QT                                                  |
|                                                   |                          |                                           |                              | KCNQ1, A302T, long QT                                                  |
|                                                   |                          | W362                                      | 0.951                        | KCNQ1, W304R, long QT                                                  |
|                                                   |                          | W363                                      | 0.991                        | KCNQ1, W305S, long QT                                                  |
|                                                   |                          | A364                                      | 1                            | KCNQ1, G306V, long QT                                                  |
|                                                   |                          | KCNQ1, G306R, long QT                     |                              |                                                                        |
| V365                                              | 0.872                    | KCNQ1, V307L, long QT                     |                              |                                                                        |
| V366                                              | 0.946                    | KCNQ1, V308D, long QT                     |                              |                                                                        |
| S367                                              | 0.994                    | KCNQ1, T309I, long QT                     |                              |                                                                        |
|                                                   |                          | KCNQ1, T309R, long QT                     |                              |                                                                        |
| M368                                              | 0.988                    | KCNQ1, V310I, long QT                     |                              |                                                                        |
| T369                                              | 0.975                    | KCNQ1, T311I, long QT                     |                              |                                                                        |
| G383                                              | 1                        | KCNQ1, G325R, long QT                     |                              |                                                                        |
| A399                                              | 0.689                    | KCNQ1, A341E, long QT                     |                              |                                                                        |
|                                                   |                          | KCNQ1, A341V, long QT                     |                              |                                                                        |
| L400                                              | 0.953                    | KCNQ1, L342F, long QT                     |                              |                                                                        |
| P401                                              | 0.992                    | KCNQ1, P343S, long QT                     |                              |                                                                        |
|                                                   |                          | KCNQ1, P343L, long QT                     |                              |                                                                        |
|                                                   |                          | KCNQ1, P343R, long QT                     |                              |                                                                        |
| V402                                              | 0.892                    | KCNQ1, A344E, long QT                     |                              |                                                                        |

| Protein structure (PDB ID)                        | Disease variant location | Residues associated with disease variants         | Fraction residue area buried | Disease gene (OMIM ID, % ID if applicable), disease mutation, disease*                                                    |
|---------------------------------------------------|--------------------------|---------------------------------------------------|------------------------------|---------------------------------------------------------------------------------------------------------------------------|
| Voltage-gated K <sup>+</sup> channel Kv1.2 (2R9R) | Soluble domain           | P403                                              | 0.586                        | KCNQ1, A344V, long QT<br>KCNQ1, G345E, long QT<br>KCNQ1, G345R, long QT                                                   |
|                                                   |                          | P186                                              | 0.639                        | KCNQ1, E146K, long QT                                                                                                     |
|                                                   |                          | C244                                              | 0.917                        | KCNQ1, A178T, long QT<br>KCNQ1, A178P, long QT                                                                            |
|                                                   |                          | P245                                              | 0.562                        | KCNQ1, G179S, long QT                                                                                                     |
|                                                   |                          | F250                                              | 0.976                        | KCNQ1, F193L, long QT                                                                                                     |
|                                                   |                          | F251                                              | 0.351                        | KCNQ1, A194P, long QT                                                                                                     |
|                                                   |                          | L310                                              | 0.895                        | KCNQ1, W248R, long QT                                                                                                     |
|                                                   |                          | I312                                              | 0.99                         | KCNQ1, L250H, long QT                                                                                                     |
|                                                   |                          | L313                                              | 0.788                        | KCNQ1, L251P, long QT                                                                                                     |
|                                                   |                          | T316                                              | 1                            | KCNQ1, V254M, long QT<br>KCNQ1, V254L, long QT                                                                            |
|                                                   |                          | E346                                              | 1                            | KCNQ1, E284K, long QT                                                                                                     |
|                                                   |                          | E349                                              | 0.508                        | KCNQ1, A287E, long QT                                                                                                     |
|                                                   |                          | T370                                              | 0.848                        | KCNQ1, T312I, long QT                                                                                                     |
|                                                   |                          | V371                                              | 0.992                        | KCNQ1, I313M, long QT                                                                                                     |
|                                                   |                          | G272                                              | 1                            | KCNQ1, G314R, long QT<br>KCNQ1, G314A, long QT<br>KCNQ1, G314D, long QT<br>KCNQ1, G314C, long QT<br>KCNQ1, G314S, long QT |
|                                                   |                          | Y373                                              | 0.959                        | KCNQ1, Y315S, long QT<br>KCNQ1, Y315C, long QT                                                                            |
|                                                   |                          | G374                                              | 0.25                         | KCNQ1, G316R, long QT<br>KCNQ1, G316E, long QT                                                                            |
|                                                   |                          | D375                                              | 0.481                        | KCNQ1, D317G, long QT<br>KCNQ1, D317N, long QT                                                                            |
|                                                   |                          | M376                                              | 0.883                        | KCNQ1, K318N, long QT                                                                                                     |
|                                                   |                          | P378                                              | 0.987                        | KCNQ1, P320A, long QT                                                                                                     |
|                                                   |                          | T380                                              | 0.796                        | KCNQ1, T322A, long QT<br>KCNQ1, T322M, long QT                                                                            |
|                                                   |                          | S407                                              | 0.217                        | KCNQ1, S349W, long QT<br>KCNQ1, S349P, long QT                                                                            |
|                                                   |                          | N408                                              | 0.736                        | KCNQ1, G350R, long QT                                                                                                     |
|                                                   |                          | F409                                              | 0.995                        | KCNQ1, F351S, long QT                                                                                                     |
|                                                   |                          | Y411                                              | 0.412                        | KCNQ1, L353P, long QT                                                                                                     |
|                                                   |                          | R415                                              | 0.417                        | KCNQ1, Q357R, long QT                                                                                                     |
|                                                   |                          | Voltage-gated K <sup>+</sup> channel Kv1.2 (2R9R) | Trans-membrane domain        | R299                                                                                                                      |
| K302                                              | 0.943                    |                                                   |                              | hERG, R528P, long QT                                                                                                      |
| R305                                              | 0.764                    |                                                   |                              | hERG, R531Q, long QT                                                                                                      |
| L326                                              | 0.869                    |                                                   |                              | hERG, L552S, long QT                                                                                                      |
| F332                                              | 0.527                    |                                                   |                              | hERG, A558P, long QT                                                                                                      |
| I333                                              | 0.93                     |                                                   |                              | hERG, L559H, long QT                                                                                                      |
| V335                                              | 0.888                    |                                                   |                              | hERG, A561V, long QT<br>hERG, A561T, long QT<br>hERG, A561P, long QT                                                      |
| I336                                              | 0.962                    |                                                   |                              | hERG, H562P, long QT                                                                                                      |
| F338                                              | 0.856                    |                                                   |                              | hERG, L564P, long QT                                                                                                      |
| S340                                              | 0.994                    |                                                   |                              | hERG, C566S, long QT                                                                                                      |
| V342                                              | 1                        |                                                   |                              | hERG, W568C, long QT<br>hERG, W568R, long QT                                                                              |
| Y343                                              | 0.916                    |                                                   |                              | hERG, Y569H, long QT                                                                                                      |
| A345                                              | 0.526                    |                                                   |                              | hERG, I571L, long QT<br>hERG, I571V, long QT                                                                              |
| I357                                              | 1                        |                                                   |                              | hERG, Y611H, long QT                                                                                                      |
| P358                                              | 0.709                    |                                                   |                              | hERG, V612L, long QT                                                                                                      |
| D359                                              | 0.468                    |                                                   |                              | hERG, T613M, long QT                                                                                                      |
| A360                                              | 1                        |                                                   |                              | hERG, A614V, long QT                                                                                                      |
| F361                                              | 0.662                    |                                                   |                              | hERG, L615V, long QT<br>hERG, L615F, long QT                                                                              |

| Protein structure (PDB ID)                        | Disease variant location | Residues associated with disease variants | Fraction residue area buried | Disease gene (OMIM ID, % ID if applicable), disease mutation, disease*                       |       |                       |
|---------------------------------------------------|--------------------------|-------------------------------------------|------------------------------|----------------------------------------------------------------------------------------------|-------|-----------------------|
| Voltage gated K <sup>+</sup> channel Kv1.2 (2R9R) | Soluble domain           | S367                                      | 0.994                        | hERG, S621R, long QT<br>hERG, S621N, long QT                                                 |       |                       |
|                                                   |                          | M368                                      | 0.988                        | hERG, L622F, long QT                                                                         |       |                       |
|                                                   |                          | T369                                      | 0.975                        | hERG, T623I, long QT                                                                         |       |                       |
|                                                   |                          | I381                                      | 0.124                        | hERG, N635I, long QT                                                                         |       |                       |
|                                                   |                          | G383                                      | 1                            | hERG, E637K, long QT<br>hERG, E637D, long QT                                                 |       |                       |
|                                                   |                          | K384                                      | 0.705                        | hERG, K638E, long QT                                                                         |       |                       |
|                                                   |                          | V386                                      | 0.834                        | hERG, F640L, long QT                                                                         |       |                       |
|                                                   |                          | G287                                      | 0.927                        | hERG, S641F, long QT                                                                         |       |                       |
|                                                   |                          | C390                                      | 1                            | hERG, V644F, long QT                                                                         |       |                       |
|                                                   |                          | A391                                      | 0.929                        | hERG, M645V, long QT<br>hERG, M645L, long QT                                                 |       |                       |
|                                                   |                          | V402                                      | 0.892                        | hERG, F656, long QT                                                                          |       |                       |
|                                                   |                          | K308                                      | 0.359                        | hERG, R534C, long QT<br>hERG, R534L, long QT                                                 |       |                       |
|                                                   |                          | E346                                      | 1                            | hERG, G572C, long QT<br>hERG, G572D, long QT<br>hERG, G572S, long QT<br>hERG, G572R, long QT |       |                       |
|                                                   |                          | G349                                      | 0.508                        | hERG, E575G, long QT                                                                         |       |                       |
|                                                   |                          | S356                                      | 1                            | hERG, R582C, long QT<br>hERG, R582L, long QT                                                 |       |                       |
|                                                   |                          | V371                                      | 0.992                        | hERG, V625E, long QT                                                                         |       |                       |
|                                                   |                          | G372                                      | 1                            | hERG, G626V, long QT<br>hERG, G626S, long QT<br>hERG, G626A, long QT                         |       |                       |
|                                                   |                          | Y373                                      | 0.959                        | hERG, F627L, long QT                                                                         |       |                       |
|                                                   |                          | G374                                      | 0.25                         | hERG, G628V, long QT<br>hERG, G628S, long QT                                                 |       |                       |
|                                                   |                          | D375                                      | 0.481                        | hERG, N629D, long QT<br>hERG, N629S, long QT<br>hERG, N629K, long QT                         |       |                       |
|                                                   |                          | M376                                      | 0.883                        | hERG, V630L, long QT<br>hERG, V630A, long QT                                                 |       |                       |
|                                                   |                          | V377                                      | 0.903                        | hERG, S631A, long QT                                                                         |       |                       |
|                                                   |                          | P378                                      | 0.987                        | hERG, P632S, long QT                                                                         |       |                       |
|                                                   |                          | T379                                      | 0.411                        | hERG, N633D, long QT<br>hERG, N633S, long QT                                                 |       |                       |
|                                                   |                          | V406                                      | 0.849                        | hERG, S660L, long QT                                                                         |       |                       |
|                                                   |                          | KCNQ1 (Kv7.1) C-terminus (3BJ4)           | Soluble domain               | G584                                                                                         | 0     | KCNQ1, G584S, long QT |
|                                                   |                          |                                           |                              | N586                                                                                         | 0.127 | KCNQ1, N586D, long QT |
|                                                   |                          |                                           |                              | T587                                                                                         | 0.327 | KCNQ1, T587M, long QT |
|                                                   |                          |                                           |                              | G589                                                                                         | 0.473 | KCNQ1, G589D, long QT |
|                                                   |                          |                                           |                              | A590                                                                                         | 0.727 | KCNQ1, A590T, long QT |
|                                                   |                          |                                           |                              | R591                                                                                         | 0.801 | KCNQ1, R591H, long QT |
|                                                   |                          |                                           |                              | R594                                                                                         | 0.652 | KCNQ1, R594Q, long QT |

\*KCNQ1 and hERG mutation data were obtained from Jackson HA, Accili EA (2008) Evolutionary analyses of KCNQ1 and hERG voltage-gated potassium channel sequences reveal location-specific susceptibility and augmented chemical severities of arrhythmogenic mutations. *BMC Evolutionary Biology* 8:188. Their alignment data with Kv1.2 were obtained from Smith JA, Vanoye CG, George AL, Jr., Meiler J, Sanders CR (2007) Structural models for the KCNQ1 voltage-gated potassium channel. *Biochemistry* 46(49):14141–14152 and from Wynia-Smith SL, Gillian-Daniel AL, Satyshur KA, Robertson GA (2008) hERG gating microdomains defined by S6 mutagenesis and molecular modeling. *J Gen Physiol* 132(5):507–520.

#Average for 5 different conformations of Ca<sup>2+</sup> ATPase: 1wpg, 1wpe, 1su4, 1t5s, and 2agv.

**Table S3. Helical membrane proteins whose oligomeric structures are used in the study**

| PDB   | Resolution (Å) | No. of residues | Source                 | Oligomer State   | No. transmembrane helices | Transmembrane fraction | Description                                                                  |
|-------|----------------|-----------------|------------------------|------------------|---------------------------|------------------------|------------------------------------------------------------------------------|
| 1dxr  | 2.0            | 1187            | <i>R. viridis</i>      | Hetero-tetramer  | 11                        | 0.2                    | Photosynthetic reaction center                                               |
| 1ehk  | 2.4            | 743             | <i>T. thermophilus</i> | Hetero-trimer    | 15                        | 0.45                   | Cytochrome c oxidase                                                         |
| 1fft  | 3.5            | 943             | <i>E. coli</i>         | Hetero-trimer    | 19                        | 0.42                   | Ubiquinol oxidase                                                            |
| 1gzm  | 2.7            | 329             | <i>B. taurus</i>       | Monomer          | 7                         | 0.5                    | Rhodopsin: rhodopsin-like GPCR                                               |
| 1jb0  | 2.5            | 2243            | <i>S. elongatus</i>    | Hetero-dodecamer | 32                        | 0.31                   | Photosynthetic reaction centers: photosystem I                               |
| 1l7v  | 3.2            | 1110            | <i>E. coli</i>         | Hetero-tetramer  | 22                        | 0.32                   | ABC transporter BtuCD                                                        |
| 1ldf  | 2.1            | 1016            | <i>E. coli</i>         | Homo-tetramer    | 32                        | 0.55                   | Glycerol uptake facilitator (GLPF): aquaporin-like                           |
| 1m0l  | 1.47           | 665             | <i>H. salinarium</i>   | Homo-trimer      | 21                        | 0.66                   | Bacteriorhodopsin: rhodopsin-like                                            |
| 1okc  | 2.2            | 292             | <i>B. taurus</i>       | Monomer          | 6                         | 0.5                    | Mitochondrial ADP/ATP carrier                                                |
| 1ots  | 2.5            | 1752            | <i>M. musculus</i>     | Hetero-hexamer   | 28                        | 0.52                   | ClC chloride channel                                                         |
| 1pw4  | 3.3            | 434             | <i>E. coli</i>         | Monomer          | 12                        | 0.61                   | Glycerol-3-phosphate transporter (MFS)                                       |
| 1q16  | 1.9            | 3952            | <i>E. coli</i>         | Hetero-hexamer   | 10                        | 0.06                   | Respiratory nitrate reductase: cytochrome b-like                             |
| 1q90  | 3.1            | 1904            | <i>C. reinhardtii</i>  | Hetero-18mer     | 26                        | 0.32                   | Cytochrome b6f: cytochrome b-like                                            |
| 1rh5  | 3.2            | 498             | <i>M. jannaschii</i>   | Hetero-trimer    | 12                        | 0.41                   | Translocase SecY protein-conducting channel                                  |
| 1rwt  | 2.7            | 654             | <i>S. oleracea</i>     | Homo-trimer      | 9                         | 0.29                   | Light-harvesting complex II photosynthesis                                   |
| 1u7 g | 1.4            | 1149            | <i>E. coli</i>         | Homo-trimer      | 33                        | 0.6                    | Ammonia channel AmtB                                                         |
| 1wpg  | 2.3            | 994             | <i>O. cuniculus</i>    | Monomer          | 10                        | 0.18                   | Ca-ATPase (P-type ATPase)                                                    |
| 1yce  | 2.4            | 979             | <i>I. tartaricus</i>   | Homo-undecamer   | 22                        | 0.57                   | F-type Na-ATPase                                                             |
| 1yew  | 2.8            | 2424            | <i>M. capsulatus</i>   | Hetero-nonamer   | 42                        | 0.28                   | Methane monooxygenase: oxidoreductase                                        |
| 1zcd  | 3.4            | 376             | <i>E. coli</i>         | Monomer          | 14                        | 0.6                    | Sodium/proton antiporter (NhaA)                                              |
| 2a65  | 1.65           | 1018            | <i>A. aeolicus</i>     | Homo-dimer       | 28                        | 0.5                    | Neurotransmitter Na <sup>+</sup> /Cl <sup>-</sup> dependent transporter LeuT |
| 2ahy  | 2.4            | 416             | <i>B. cereus</i>       | Homo-tetramer    | 12                        | 0.57                   | Potassium voltage-gated ion channel                                          |
| 2axt  | 3.0            | 5078            | <i>T. elongatus</i>    | Hetero-34mer     | 72                        | 0.28                   | Photosystem II: Photosynthetic reaction centers                              |
| 2bl2  | 2.1            | 1560            | <i>E. hirae</i>        | Homo-decamer     | 40                        | 0.65                   | V-type Na ATPase: hydrolase                                                  |
| 2bs2  | 1.78           | 2302            | <i>W. succinogenes</i> | Hetero-hexamer   | 10                        | 0.09                   | Oxidoreductase: quinol-fumarate reductase                                    |
| 2cfq  | 2.95           | 417             | <i>E. coli</i>         | Monomer          | 12                        | 0.66                   | Lactose permease (MFS)                                                       |
| 2 gfp | 3.5            | 375             | <i>E. coli</i>         | Monomer          | 12                        | 0.70                   | Multidrug transporter EmrD (MFS)                                             |
| 2 gif | 2.9            | 3108            | <i>E. coli</i>         | Homo-trimer      | 36                        | 0.23                   | AcrB Acriflavine multidrug resistance transporter                            |
| 2ic8  | 2.1            | 182             | <i>E. coli</i>         | Monomer          | 6                         | 0.57                   | Protease glpG: Rhomboid protein                                              |
| 2nwl  | 3.0            | 1203            | <i>P. horikoshii</i>   | Homo-trimer      | 39                        | 0.5                    | Proton glutamate symport protein                                             |
| 2oar  | 3.5            | 625             | <i>M. tuberculosis</i> | Homo-pentamer    | 10                        | 0.45                   | Large conductance mechanosensitive channel MscL                              |
